# Supplementary material for: Predicting water uptake in poly(perfluorosulfonic acids) using force field simulation methods
Source: Royal Society of Chemistry journal article supplement (doi:10.1039/c0cp00827c), 2010-01-01
Supplement: c0cp00827c.pdf [file c0cp00827c.pdf]

**Supplementary Information: The force field parameters**

TABLE 1: Partial Charges on the PPFSA and Hydronium Ion, the atom numbers for Nafion-117 are illustrated in Figure 1.

|            | Atom type      | Atom number | Partial Charges |
|------------|----------------|-------------|-----------------|
| PPFSA      | C              | 1,1,1       | 0.2164          |
|            |                | 2,2         | 0.1983          |
|            |                | 3,3         | 0.3065          |
|            |                | 4           | 0.3246          |
|            |                | 5           | -0.0805         |
|            | F              | 1           | -0.1082         |
|            | O              | 1,1         | -0.1802         |
| Nafion-117 | S              |             | 1.0559          |
|            | O <sub>s</sub> |             | -0.5863         |
|            | H <sub>h</sub> |             | 0.416           |
|            | O <sub>h</sub> |             | -0.248          |

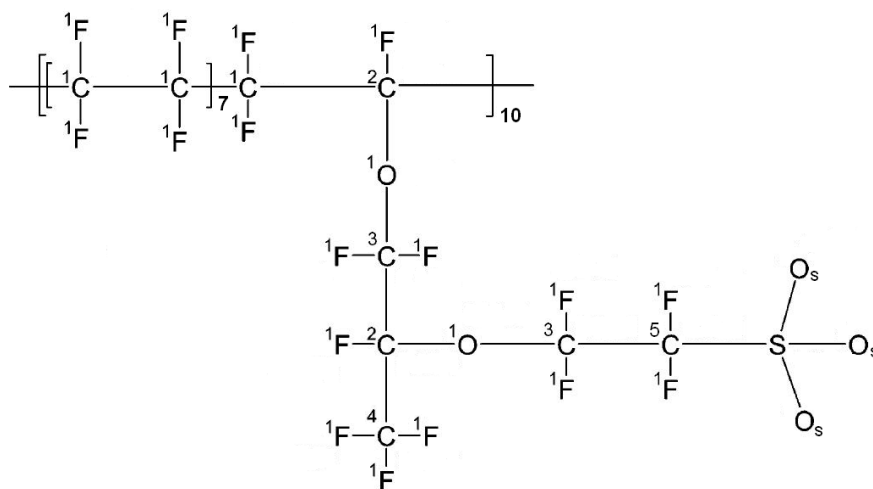

Fig. 1 The atom types and atom numbers in Nafion-117

TABLE 2: Force Field Parameters for the PPFSA and Hydronium Ion

| Bond type                                      | $r_0$ (Å)                                | $k_b$ (kcal/mol/ Å <sup>2</sup> )        |                                          |
|------------------------------------------------|------------------------------------------|------------------------------------------|------------------------------------------|
| C-C                                            | 1.5356                                   | 276.0580                                 |                                          |
| C-S                                            | 1.8545                                   | 176.4593                                 |                                          |
| C-F                                            | 1.3485                                   | 338.8046                                 |                                          |
| C-O <sub>E</sub>                               | 1.3622                                   | 297.7457                                 |                                          |
| O <sub>S</sub> -S                              | 1.4800                                   | 587.9230                                 |                                          |
| H <sub>h</sub> -O <sub>h</sub>                 | 0.9820                                   | 543.0000                                 |                                          |
| Angle type                                     | $\theta$ (degree)                        | $k_\theta$ (kcal/mol/rad <sup>2</sup> )  |                                          |
| C-C-C                                          | 109.0639                                 | 44.4644                                  |                                          |
| C-C-S                                          | 115.2954                                 | 18.3324                                  |                                          |
| C-C-O <sub>E</sub>                             | 110.7657                                 | 43.5794                                  |                                          |
| C-S-O <sub>S</sub>                             | 112.0818                                 | 62.4607                                  |                                          |
| O <sub>S</sub> -S-O <sub>S</sub>               | 125.8476                                 | 98.8656                                  |                                          |
| F-C-C                                          | 106.7816                                 | 60.7610                                  |                                          |
| F-C-O <sub>E</sub>                             | 108.9077                                 | 63.9312                                  |                                          |
| F-C-F                                          | 107.9771                                 | 85.7607                                  |                                          |
| F-C-S                                          | 109.7797                                 | 33.5332                                  |                                          |
| C-O <sub>E</sub> -C                            | 120.6078                                 | 117.1048                                 |                                          |
| H <sub>h</sub> -O <sub>h</sub> -H <sub>h</sub> | 113.0000                                 | 79.0263                                  |                                          |
| Dihedral type                                  | n=1, $\varphi_0=0$                       | n=2, $\varphi_0=\pi$                     | n=3, $\varphi_0=0$                       |
|                                                | $k_\varphi$ (kcal/mol/rad <sup>2</sup> ) | $k_\varphi$ (kcal/mol/rad <sup>2</sup> ) | $k_\varphi$ (kcal/mol/rad <sup>2</sup> ) |
| C-C-C-F                                        | 0                                        | 0                                        | 0.1570                                   |
| F-C-C-F                                        | 0                                        | 0                                        | -0.0490                                  |
| C-C-C-C                                        | 0.4                                      | -0.1980                                  | 0.1390                                   |
| C-C-C-O <sub>E</sub>                           | 0                                        | 3.8543                                   | -0.9799                                  |
| F-C-C-O <sub>E</sub>                           | 0                                        | 4.5948                                   | 0.1692                                   |
| C-O <sub>E</sub> -C-F                          | 0                                        | 1.7199                                   | 0.0824                                   |
| C-C-O <sub>E</sub> -C                          | 0                                        | 1.7706                                   | 0.4405                                   |
| O <sub>E</sub> -C-C-S                          | 0                                        | 0.5035                                   | 0.6250                                   |
| F-C-C-S                                        | 0                                        | -3.3082                                  | -0.0612                                  |
| C-C-S-O <sub>S</sub>                           | 0                                        | 2.4770                                   | -0.1478                                  |
| F-C-S-O <sub>S</sub>                           | 0                                        | 2.9759                                   | 0.1545                                   |
| O <sub>E</sub> -C-C- O <sub>E</sub>            | 0                                        | 7.5972                                   | 1.2930                                   |
| Van der Waals                                  | $\varepsilon$ ( kcal/mol)                | $R$ (Å)                                  |                                          |
| C                                              | 0.0660                                   | 3.9286                                   |                                          |
| F                                              | 0.0530                                   | 3.3113                                   |                                          |
| S                                              | 0.2500                                   | 3.9847                                   |                                          |
| O <sub>E</sub>                                 | 0.1400                                   | 3.2551                                   |                                          |
| O <sub>S</sub>                                 | 0.1700                                   | 3.3225                                   |                                          |
| O <sub>h</sub>                                 | 0.1848                                   | 3.5532                                   |                                          |
